# Supplementary material
Source: Springer Nature journal article supplement (https://www.springermedizin.de/resource/supplementary/12875_2010_563_MOESM5_ESM.pdf/9434950)

## I would like to keep receiving updated information sheets

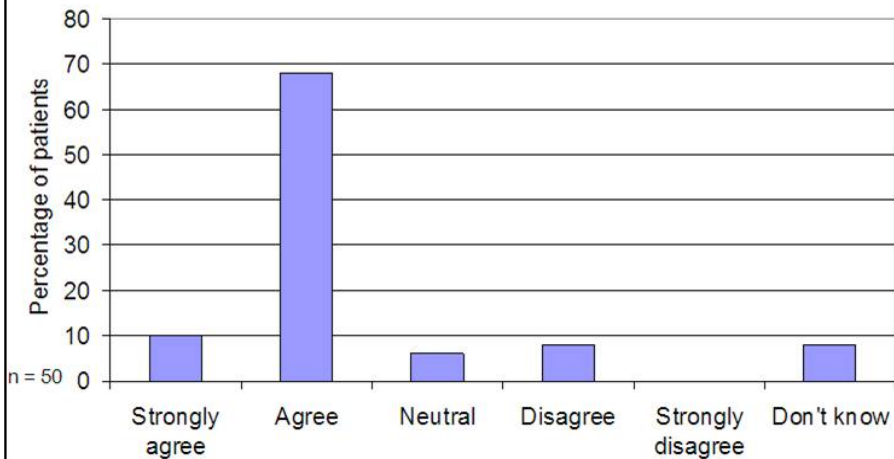

Supplement: MOESM5 [file 9434950]
